# Supplementary material
Source: publisher site journal article supplement (https://neobiota.pensoft.net/article/58196/download/suppl/32/)
Supplement: Supplementary file 1

**Supplement 2:** Description of the Impacted Sector categories.

| **Sector** | **Description** |
| --- | --- |
| Agriculture | Considered at its broadest sense, food and other useful products produced by human activities through using natural and/plant resources from their ecosystems (e.g. crop growing, livestock breeding, beekeeping, land management) |
| Authorities-Stakeholders | Governmental services and/or official organisations (e.g. conservation agencies, forest services, associations) that allocate efforts for the management sensu lato of biological invasions (e.g. control programs, eradication campaigns, research funding) |
| Environment | Impacts on natural resources, ecological processes and/or ecosystem services that have been valued by authors such as disruption of native habitats or degradation of local habitats |
| Fishery | Fish-based activities and services such as fishing and aquaculture |
| Forestry | Forest-based activities and services such as timber production/industries and private forests |
| Health | Every item directly or indirectly related to the sanitary state of people such as vector control, medical care and other derived damage on human productivity and well-being |
| Public and social welfare | Activities, goods or services contributing - directly or indirectly - to the human well-being and safety in our societies, including local infrastructures (e.g. electric system), quality of life (e.g. income, recreational activities), personal goods (e.g. private properties, lands), public services (e.g. transports, water regulation), and market activities (e.g. tourism, trade) |
